# Supplementary material
Source: Springer Nature journal article supplement (https://www.springermedizin.de/resource/supplementary/12906_2013_1637_MOESM4_ESM.pdf/9523154)

**A**

Blood corticosterone (ng/mL)

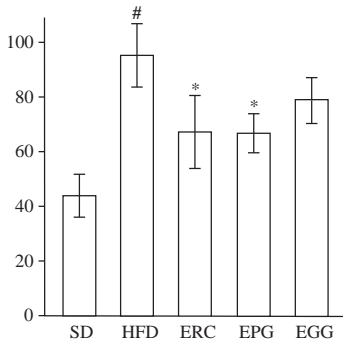**B**

Adrenal corticosterone (ng/g)

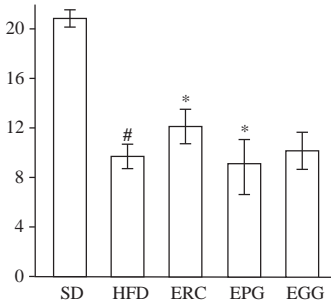

Supplement: MOESM4 [file 9523154]
